# Supplementary material for: Albumin and Hyaluronic Acid-Coated Superparamagnetic Iron Oxide Nanoparticles Loaded with Paclitaxel for Biomedical Applications
Source: PubMed Central journal article supplement (PMC6152103; doi:10.3390/molecules22071030), 2017-06-22
Supplement: molecules-22-01030-s001.pdf [file molecules-22-01030-s001.pdf]

## Supplementary materials

### Albumin and Hyaluronic Acid-Coated Superparamagnetic Iron Oxide Nanoparticle Loaded with Paclitaxel for Biomedical Applications

Elena Vismara<sup>1,\*</sup>, Chiara Bongio<sup>1</sup>, Alessia Coletti<sup>1</sup>, Ravit Edelman<sup>5</sup>, Andrea Serafini<sup>1</sup>, Michele Mauri<sup>2</sup>, Roberto Simonutti<sup>2</sup>, Sabrina Bertini<sup>3</sup>, Elena Urso<sup>3</sup>, Yehuda Assaraf<sup>4</sup>, and Yoav D. Livney<sup>5,\*</sup>

<sup>1</sup> Department of Chemistry, Materials and Chemical Engineering "G. Natta", Politecnico di Milano, 20131 Milano, Italy; E-mail: [elena.vismara@polimi.it](mailto:elena.vismara@polimi.it)

<sup>2</sup> Department of Materials Science, University of Milan Bicocca, 20125 Milano, Italy; E-mail: [michele.mauri@mater.unimib.it](mailto:michele.mauri@mater.unimib.it)

<sup>3</sup> Istituto scientifico di chimica e biochimica "G. Ronzoni", 20133 Milano, Italy; E-mail: [bertini@ronzoni.it](mailto:bertini@ronzoni.it)

<sup>4</sup> Biology Department, Technion-Israel Institute of Technology, Haifa, 3200000, Israel; E-mail: [assaraf@technion.ac.il](mailto:assaraf@technion.ac.il)

<sup>5</sup> Biotechnology and Food Engineering Department, Technion-Israel Institute of Technology, Haifa, 3200000, Israel; E-mail: [livney@technion.ac.il](mailto:livney@technion.ac.il)

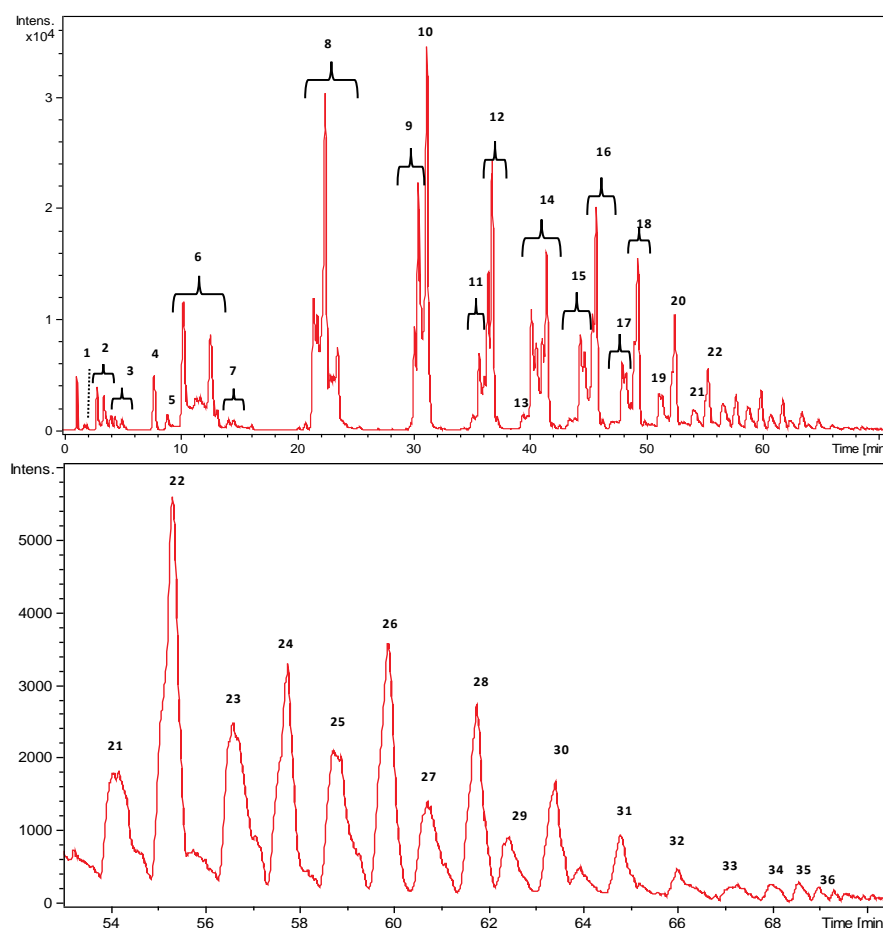

**Figure S1.** HPLC/ESI-Q-TOF mass spectrometry profile of intact hyaluronic acid: the whole chromatogram (upper panel) and the expanded chromatogram portion at higher retention times (lower panel). *Assignment of the labelled peaks are reported in table S1).*

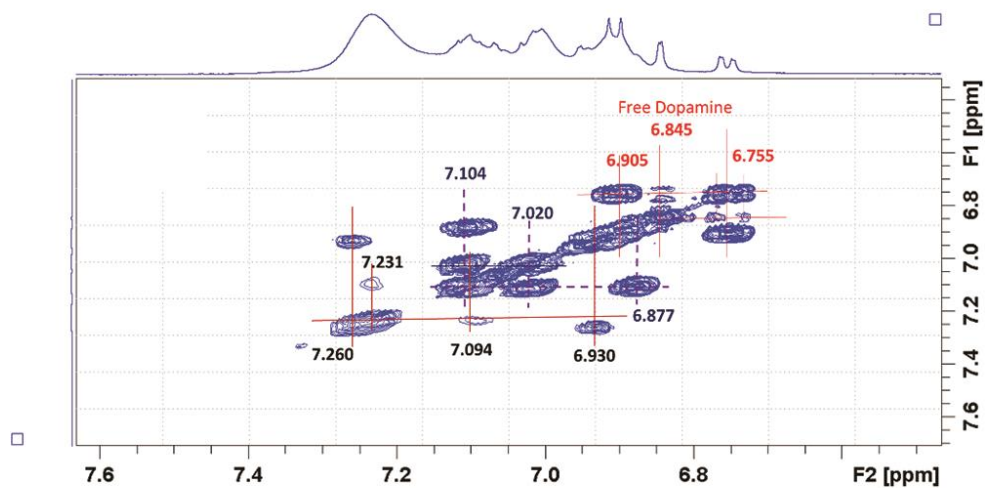

**Figure S2.** COSY spectrum, expansion of aromatic signals. Three correlation systems are well evident, a signal belonging to a fourth one is also shown.

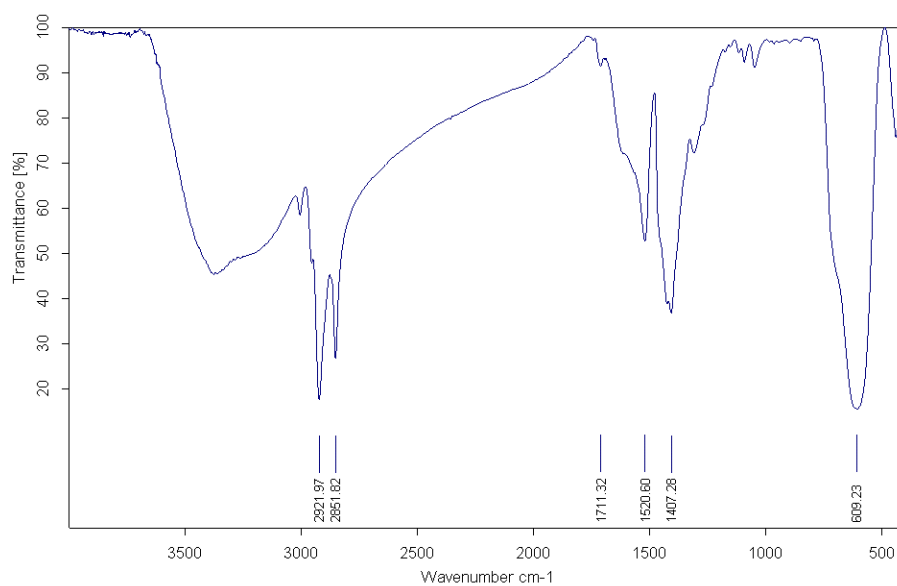

**Figure S3.** FT-IR spectrum of sample SPION1

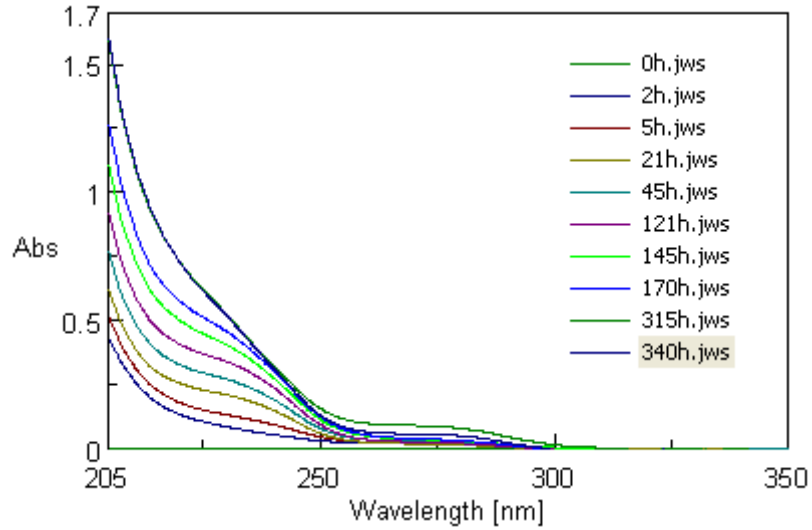

**Figure S4.** UV-vis spectra of dialysate buffer at selected times

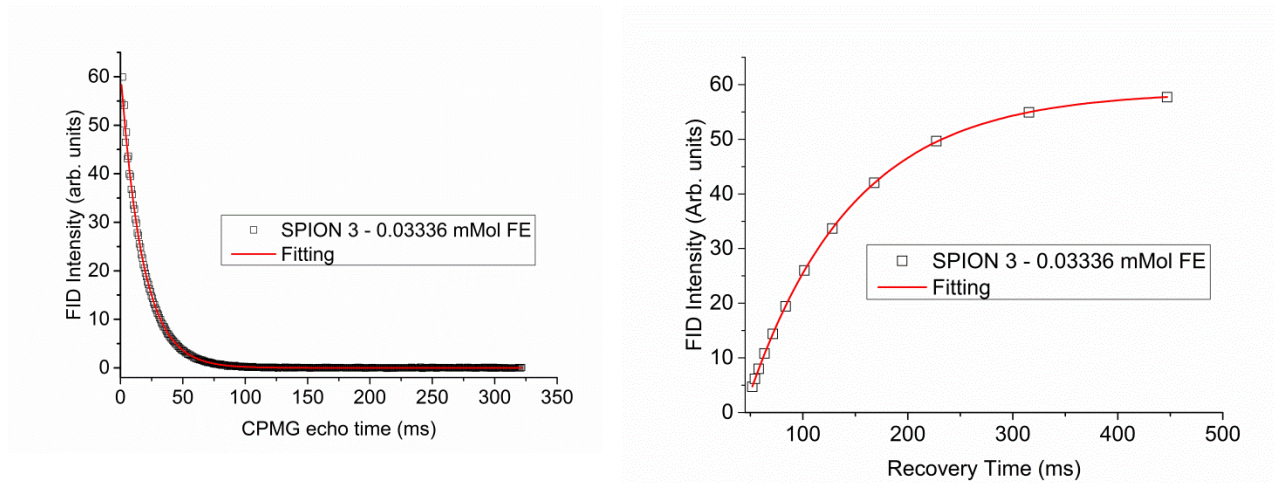

**Figure S5:** Example of monomodal fitting for sample **SPION3** diluted to 0.125 of the initial concentration. On the left, fitting of CPMG data with an exponential decay function. On the right, fitting of the saturation recovery curve.

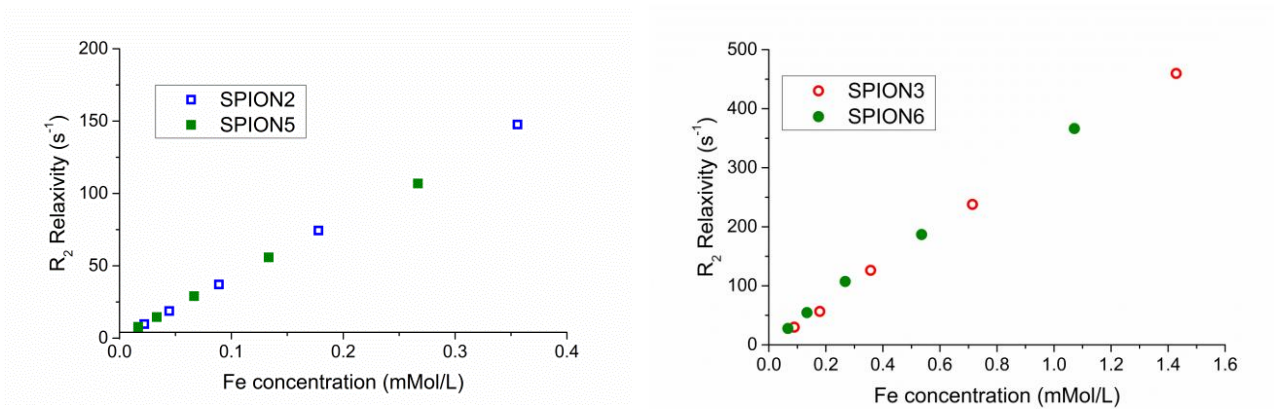

**Figure S6:** Comparison between analogous particles before and after addition of PTX.

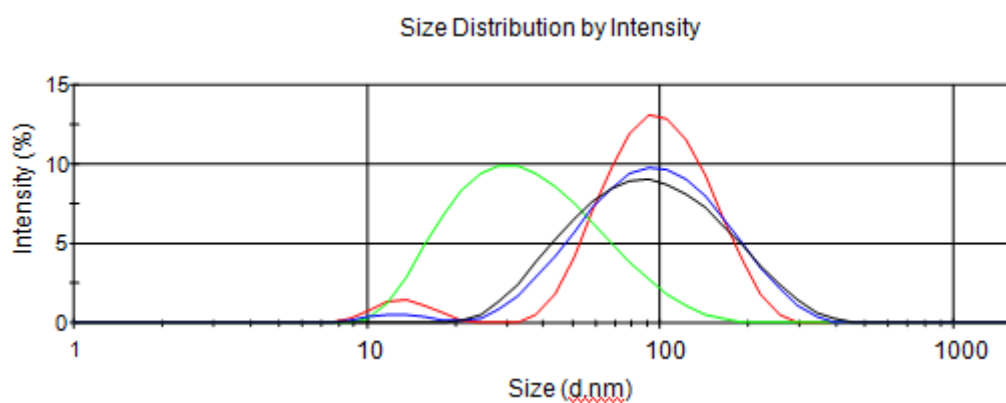

Figure S7. DLS profiles of SPION1 (green), SPION2 (red), SPION3 (blue) and SPION6 (black)

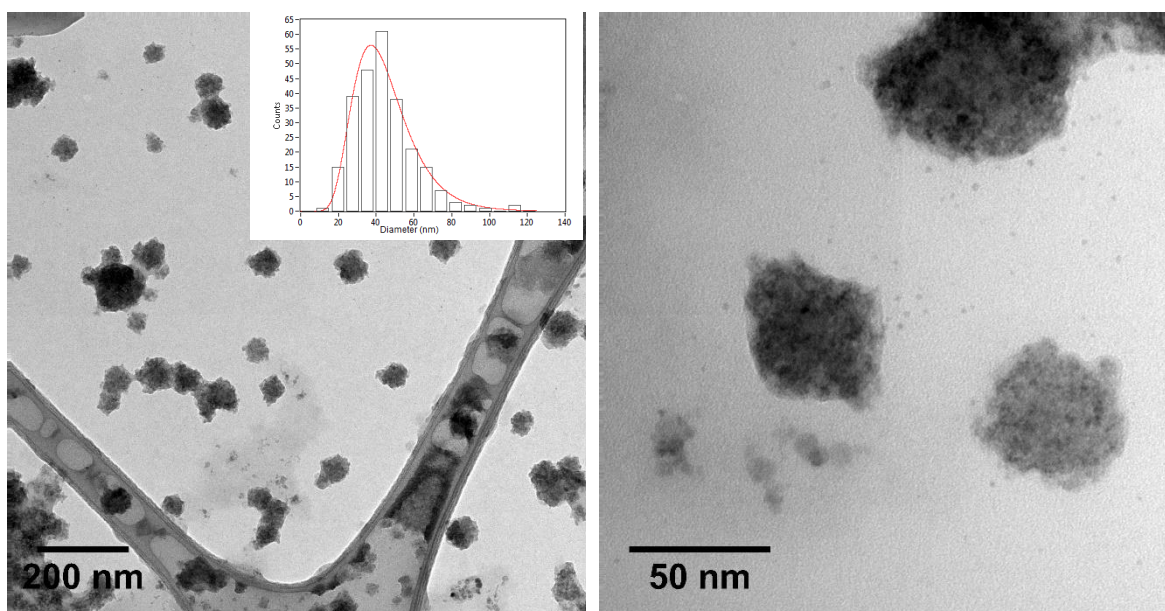

Figure S8. TEM analysis on supra-particles (SPION6): Low (A) and high (B) magnification bright field micrographs and size distribution histogram of the supra-particles ensemble (C).

**Table S1.** Experimental and theoretical masses values for identified hyaluronic oligosaccharides.

Regular chains where all the glucosamine residues are acetylated (**green** structures); components where one and two glucosamine residues are not acetylated (**red** and **black** structures, respectively); odd species exhibiting a glucuronic acid both at the reducing and at the non reducing end. Regarding to the oligomers containing non N-acetylated glucosamine residues, the extremely high mass accuracy of the MS detector allow to determine the type and number of monomers of each component, but doesn't provide the exact sequence.

| Peak N. | Experimental m/z  | z  | M      | Structure hypothesis                         | Theoretical m/z | Error (ppm) |        |
|---------|-------------------|----|--------|----------------------------------------------|-----------------|-------------|--------|
| 1       | 691.2046          | -1 | 692.2  | (G-A) <sub>2</sub>                           | 691.2040        | 0.9         | 4 mer  |
| 2       | 733.2142          | -1 | 734.2  | G-A- G-ANac                                  | 733.2145        | 0.4         | 4 mer  |
| 3       | 534.6551          | -2 | 1071.3 | (G-A) <sub>2</sub> - G-ANac                  | 534.6535        | 2.3         | 6 mer  |
| 4       | 572.1462          | -1 | 573.1  | (G-ANac) <sub>1</sub> -G                     | 572.1457        | 0.9         | 3 mer  |
| 5       | 775.2243          | -1 | 776.2  | (G-ANac) <sub>2</sub>                        | 775.2251        | 1.0         | 4 mer  |
| 6       | 555.6604          | -2 | 1113.2 | (G-A)-(G-ANac) <sub>2</sub>                  | 555.6588        | 2.9         | 6 mer  |
| 7       | 724.2099          | -2 | 1450.4 | (G-A) <sub>2</sub> -(G-ANac) <sub>2</sub>    | 724.2093        | 0.8         | 8 mer  |
| 8       | <u>576.6654</u>   | -2 | 1155.3 | (G-ANac) <sub>3</sub>                        | 576.6641        | 2.2         | 6 mer  |
|         | + 745.2154        | -2 | 1492.4 | (G-A)-(G-ANac) <sub>3</sub>                  | 745.2145        | 1.2         | 8 mer  |
| 9       | 934.7700          | -2 | 1871.5 | (G-A)-(G-ANac) <sub>4</sub>                  | 934.7703        | 0.3         | 10 mer |
| 10      | 934.7705          | -2 | 1871.5 | (G-A)-(G-ANac) <sub>4</sub>                  | 934.7703        | 0.2         | 10 mer |
|         | + 664.6813        | -2 | 1331.4 | (G-ANac) <sub>3</sub> -G                     | 664.6801        | 1.8         | 7 mer  |
|         | + <u>766.2206</u> | -2 | 1534.4 | (G-ANac) <sub>4</sub>                        | 766.2198        | 1.0         | 8 mer  |
| 11      | 861.5831          | -3 | 2588.7 | (G-A) <sub>2</sub> -(G-ANac) <sub>5</sub>    | 861.5815        | 1.9         | 14 mer |
|         | + <u>749.2163</u> | -3 | 2250.6 | (G-A) <sub>1</sub> -(G-ANac) <sub>5</sub>    | 749.2145        | 2.4         | 12 mer |
| 12      | 854.2366          | -2 | 1710.5 | (G-ANac) <sub>4</sub> -G                     | 854.2359        | 0.8         | 9 mer  |
|         | + <u>955.7757</u> | -2 | 1913.6 | (G-ANac) <sub>5</sub>                        | 955.7756        | 0.1         | 10 mer |
| 13      | 987.9534          | -3 | 2966.9 | (G-A) <sub>2</sub> -(G-ANac) <sub>6</sub>    | 987.9520        | 1.4         | 16 mer |
| 14      | <u>763.2198</u>   | -3 | 2292.7 | (G-ANac) <sub>6</sub>                        | 763.2181        | 2.2         | 12 mer |
|         | + 875.5864        | -3 | 2629.8 | (G-A) <sub>1</sub> -(G-ANac) <sub>6</sub>    | 875.5850        | 1.6         | 14 mer |
| 15      | 1001.9574         | -3 | 3008.9 | (G-A) <sub>1</sub> -(G-ANac) <sub>7</sub>    | 1001.9555       | 1.9         | 16 mer |
| 16      | <u>889.5904</u>   | -3 | 2671.8 | (G-ANac) <sub>7</sub>                        | 889.5886        | 2.0         | 14 mer |
|         | + 821.8970        | -3 | 2468.7 | (G-ANac) <sub>6</sub> -G                     | 821.8954        | 1.9         | 13 mer |
| 17      | <u>1128.3276</u>  | -3 | 3388.0 | (G-A) <sub>1</sub> -(G-ANac) <sub>8</sub>    | 1128.3260       | 1.4         | 18 mer |
|         | 1060.6347         | -3 | 3184.9 | (G-A) <sub>1</sub> -(G-ANac) <sub>7</sub> -G | 1060.6333       | 1.3         | 17 mer |
| 18      | <u>1015.9610</u>  | -3 | 3050.9 | (G-ANac) <sub>8</sub>                        | 1015.9590       | 2.0         | 16 mer |
|         | + 948.2670        | -3 | 2847.8 | (G-ANac) <sub>7</sub> -G                     | 948.2659        | 1.2         | 15 mer |
| 19      | <u>1254.6981</u>  | -3 | 3767.1 | (G-A) <sub>1</sub> -(G-ANac) <sub>9</sub>    | 1254.6965       | 1.3         | 20 mer |
|         | + 1187.0052       | -3 | 3564.0 | (G-A) <sub>1</sub> -(G-ANac) <sub>8</sub> -G | 1187.0034       | 1.5         | 19 mer |
| 20      | <u>1142.3308</u>  | -3 | 3430.0 | (G-ANac) <sub>9</sub>                        | 1142.3295       | 1.1         | 18 mer |
|         | + 1074.6378       | -3 | 3226.9 | (G-ANac) <sub>8</sub> -G                     | 1074.6364       | 1.3         | 17 mer |
| 21      | <u>1035.5505</u>  | -4 | 4146.2 | (G-A) <sub>1</sub> -(G-ANac) <sub>10</sub>   | 1035.5481       | 2.3         | 22 mer |
|         | + 1381.0697       | -4 | 5528.4 | n.d. <sup>a</sup>                            |                 |             |        |
| 22      | <u>1268.7015</u>  | -4 | 5078.8 | n.d. <sup>a</sup>                            |                 |             |        |
|         | + 1201.0080       | -4 | 4808.0 | n.d. <sup>a</sup>                            |                 |             |        |
| 23      | 1130.3278         | -4 | 4525.3 | (G-A) <sub>1</sub> -(G-ANac) <sub>11</sub>   | 1130.3260       | 1.6         | 24 mer |
| 24      | <u>1046.0526</u>  | -4 | 4188.2 | (G-ANac) <sub>11</sub>                       | 1046.0508       | 1.7         | 22 mer |
|         | + 1395.0722       | -4 | 5584.3 | n.d. <sup>a</sup>                            |                 |             |        |
| 25      | 1225.1068         | -4 | 4904.4 | (G-A) <sub>1</sub> -(G-ANac) <sub>12</sub>   | 1225.1039       | 2.4         | 26 mer |
| 26      | <u>1140.8313</u>  | -4 | 4571.3 | (G-ANac) <sub>12</sub>                       | 1140.8286       | 2.4         | 24 mer |
|         | + 1090.0609       | -4 | 4364.2 | (G-ANac) <sub>11</sub> -G                    | 1090.0588       | 1.9         |        |
| 27      | <u>1319.8853</u>  | -4 | 5283.6 | (G-A) <sub>1</sub> -(G-ANac) <sub>13</sub>   | 1319.8817       | 2.7         | 23 mer |
|         | + 1269.1113       | -4 | 5080.4 | n.d. <sup>a</sup>                            |                 |             |        |
| 28      | <u>1235.6101</u>  | -4 | 4946.4 | (G-ANac) <sub>13</sub>                       | 1235.6065       | 2.9         | 26 mer |
|         | + 1184.8404       | -4 | 4743.4 | (G-ANac) <sub>12</sub> -G                    | 1184.8367       | 3.1         | 25 mer |
| 29      | 1414.6649         | -4 | 5662.6 | (G-A) <sub>1</sub> -(G-ANac) <sub>14</sub>   | 1414.6596       | 3.7         | 30 mer |
| 30      | <u>1330.3883</u>  | -4 | 5325.6 | (G-ANac) <sub>14</sub>                       | 1330.3844       | 2.9         | 28 mer |
|         | + 1279.6168       | -4 | 5122.5 | (G-ANac) <sub>13</sub> -G                    | 1279.6145       | 1.8         | 27 mer |
| 31      | 1425.1662         | -4 | 5704.7 | (G-ANac) <sub>15</sub>                       | 1425.1622       | 2.8         | 30 mer |
| 32      | 1519.9445         | -4 | 6083.8 | (G-ANac) <sub>16</sub>                       | 1519.9401       | 2.9         | 32 mer |
| 33      | 1434.8190         | -5 | 7179.0 | (G-A) <sub>1</sub> -(G-ANac) <sub>18</sub>   | 1434.8152       | 2.6         | 38 mer |
| 34      | 1510.6503         | -5 | 7558.3 | (G-A) <sub>1</sub> -(G-ANac) <sub>19</sub>   | 1510.6375       | 8.5         | 40 mer |
|         | + 1367.4001       | -5 | 6842.0 | (G-ANac) <sub>18</sub>                       | 1367.3950       | 3.7         | 36 mer |
| 35      | 1443.2228         | -5 | 7222.1 | (G-ANac) <sub>19</sub>                       | 1443.2173       | 3.8         | 38 mer |
| 36      | 1519.0577         | -5 | 7600.5 | (G-ANac) <sub>20</sub>                       | 1519.0396       | 12          | 40 mer |

G: Glucuronic acid; A: glucosamine; ANac: N-acetyl glucosamine. Underlined value: main species.

**Table S2.** Experimental masses values for identified derivatized hyaluronic oligosaccharides.

| Peaks group | Experimental m/z | Charge state (z) | Molecular weight of derivatized oligomer | Mass interpretation                            | Molecular weight of intact HA oligomer |
|-------------|------------------|------------------|------------------------------------------|------------------------------------------------|----------------------------------------|
| a           | 742.2520         | -2               | 1486.5                                   | (G-ANac) <sub>2</sub> -G + X                   | 952.4                                  |
|             | 843.7902         | -2               | 1689.6                                   | (G-ANac) <sub>3</sub> + X                      | 1155.3                                 |
| b           | 1201.8923        | -2               | 2405.8                                   | (G-ANac) <sub>4</sub> -G -A + X                | 1871.5                                 |
|             | 1033.3466        | -2               | 2068.7                                   | (G-ANac) <sub>4</sub> + X                      | 1534.4                                 |
| c           | 1222.8952        | -2               | 2447.8                                   | (G-ANac) <sub>5</sub> + X                      | 1913.6                                 |
| d           | 941.3048         | -3               | 2826.9                                   | (G-ANac) <sub>6</sub> + X                      | 2292.7                                 |
|             | 1166.0331        | -3               | 3501.0                                   | (G-ANac) <sub>6</sub> - (G-A) <sub>2</sub> + X | 2966.9                                 |
| e           | 1067.6738        | -3               | 3206.0                                   | (G-ANac) <sub>7</sub> + X                      | 2671.8                                 |
|             | 1180.0499        | -3               | 3543.2                                   | (G-ANac) <sub>7</sub> - G-A + X                | 3008.9                                 |
|             | 999.9759         | -2               | 2001.95                                  | n.d                                            | -                                      |
| f           | 1194.0448        | -3               | 3585.1                                   | (G-ANac) <sub>8</sub> + X                      | 3050.9                                 |
|             | 1306.4210        | -3               | 3922.3                                   | (G-ANac) <sub>8</sub> - G-A + X                | 3388.0                                 |
| g           | 1320.4192        | -3               | 3964.2                                   | (G-ANac) <sub>9</sub> + X                      | 3430.0                                 |
|             | 1432.7853        | -3               | 4301.4                                   | (G-ANac) <sub>9</sub> - G-A + X                | 3767.1                                 |

where X corresponding to a mass difference of about 534.3, was identified as C<sub>32</sub>H<sub>30</sub>N<sub>4</sub>O<sub>4</sub> (theoretical value of neutral monoisotopic mass: 534.2267) suggesting the formation of derivatized HA chains containing at least three dopamine molecules.

**Table S3:** Comparison between lattice d-spacing extracted from SAED ring pattern (**Figure 7**, TEM of **SPION1**) and the standard atomic spacings for Fe<sub>3</sub>O<sub>4</sub> along with their respective hkl indexes from the PDF database.

| Ring | h | k | l | d-spacing (Å) |                                         |
|------|---|---|---|---------------|-----------------------------------------|
|      |   |   |   | SPION1        | Standard Fe <sub>3</sub> O <sub>4</sub> |
| 1    | 2 | 2 | 0 | 2.97          | 2.97                                    |
| 2    | 3 | 1 | 1 | 2.54          | 2.53                                    |
| 3    | 4 | 0 | 0 | 2.11          | 2.10                                    |
| 4    | 4 | 2 | 2 | 1.72          | 1.71                                    |
| 5    | 5 | 1 | 1 | 1.62          | 1.61                                    |
| 6    | 4 | 4 | 0 | 1.49          | 1.48                                    |

**Table S4:** Dimensional analysis data of iron oxide nanocrystals and final nanosystems.

| Sample        | Counted NPs | NPs mean diameter (nm) | $\sigma^-$ (nm) | $\sigma^+$ (nm) | Counted nanosystems | Particles mean diameter (nm) | $\sigma^-$ (nm) | $\sigma^+$ (nm) |
|---------------|-------------|------------------------|-----------------|-----------------|---------------------|------------------------------|-----------------|-----------------|
| <b>SPION1</b> | 1280        | 4.7                    | 1.6             | 1.6             |                     |                              |                 |                 |
| <b>SPION2</b> |             |                        |                 |                 | 235                 | 119                          | 27              | 35              |
| <b>SPION3</b> |             |                        |                 |                 | 251                 | 40                           | 16              | 28              |
| <b>SPION4</b> |             |                        |                 |                 | 241                 | 25                           | 9               | 13              |
| <b>SPION6</b> |             |                        |                 |                 | 253                 | 37                           | 14              | 24              |
